# Supplementary material for: Chronic activation of GPR40 does not negatively impact upon BRIN-BD11 pancreatic β-cell physiology and function
Source: PubMed Central journal article supplement (PMC7704488; doi:10.1007/s43440-020-00101-6), 2020-04-09

# Supplementary figure 1

**A**

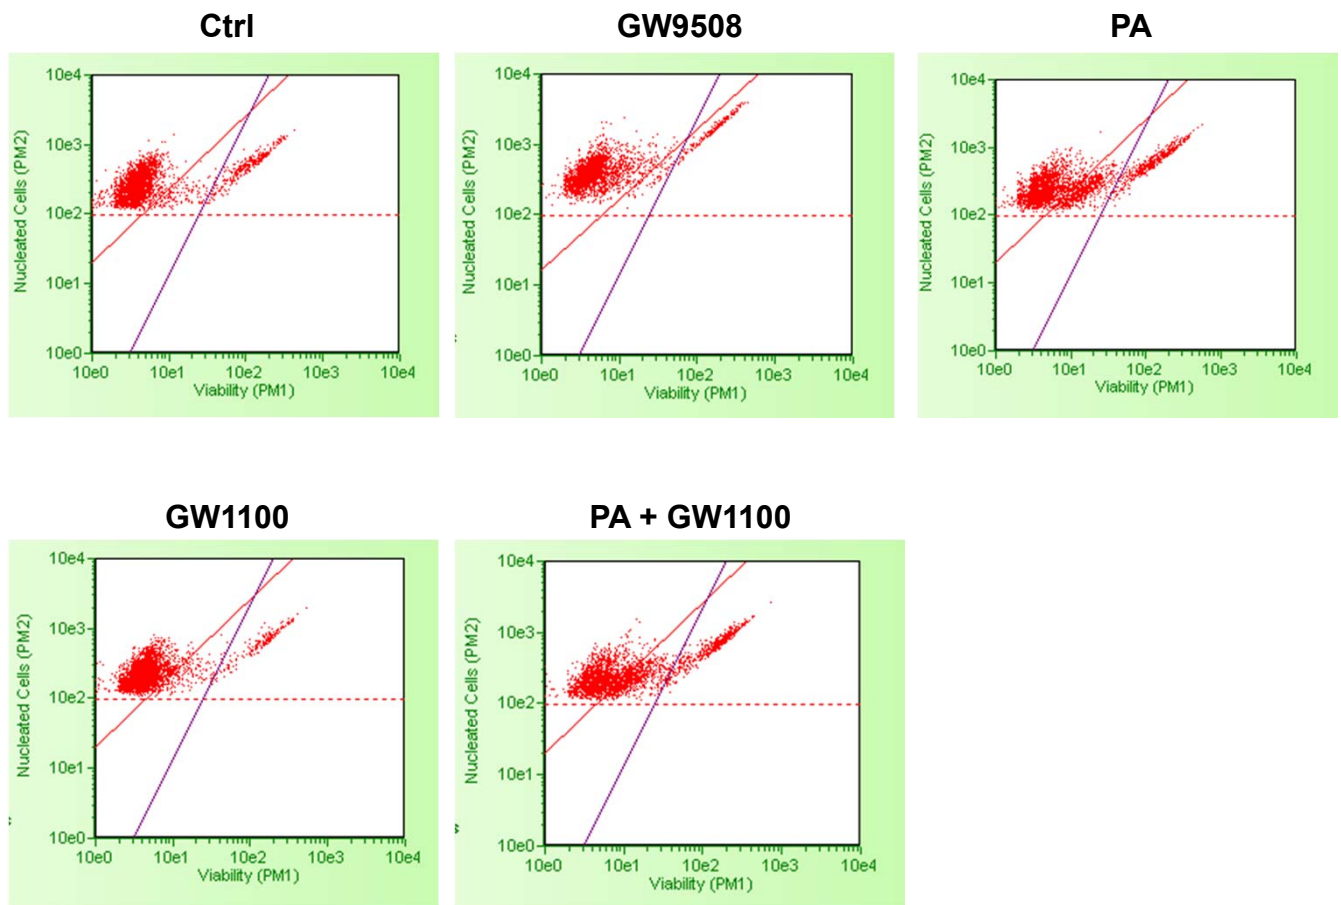

## Supplementary figure 2

**A**

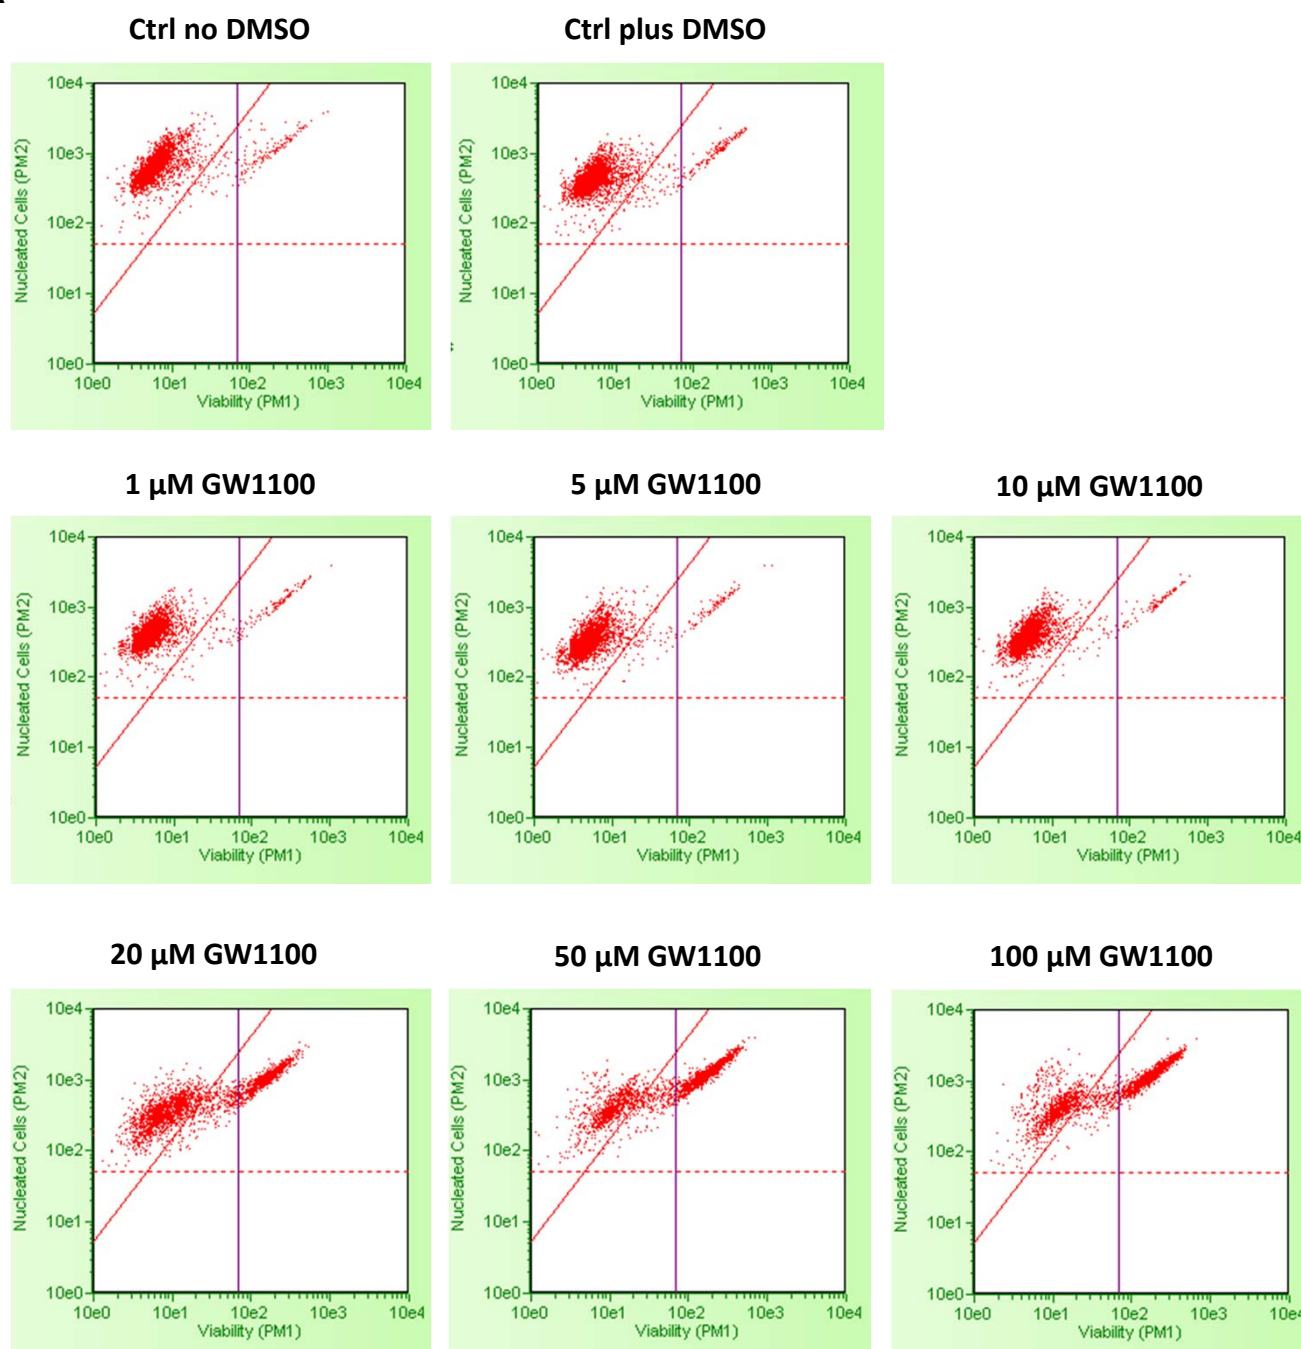

**B**

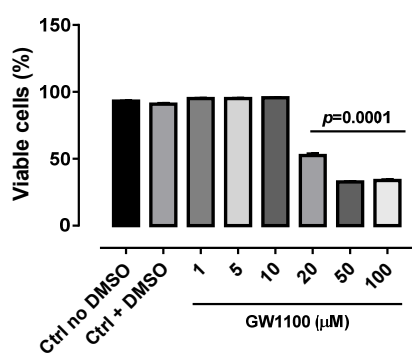

**C**

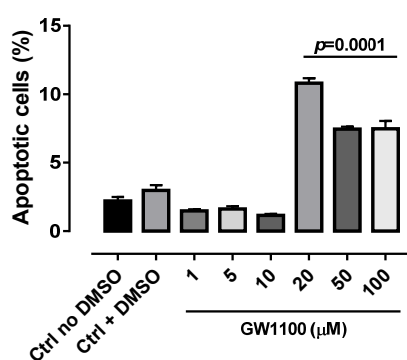

**D**

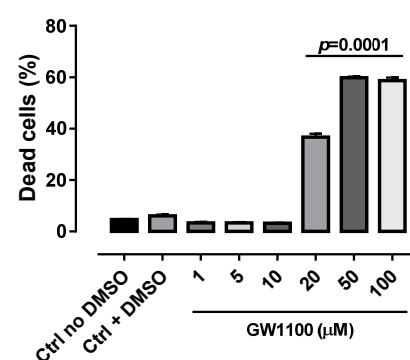

Supplement: 43440_2020_101_MOESM1_ESM.pdf [file 43440_2020_101_MOESM1_ESM.pdf]
